# Supplementary material for: Modified boehmite: a choice of catalyst for the selective conversion of glycerol to five-membered dioxolane
Source: Royal Society of Chemistry journal article supplement (doi:10.1039/d1nj04860k), 2021-11-26
Supplement: d1nj04860k1.pdf [file d1nj04860k1.pdf]

## Supplementary Information

### **Modified Boehmite: A choice of catalyst for the selective conversion of glycerol to five-membered dioxolane**

Manas Barik,<sup>a,b</sup> Jyotiranjana Mishra,<sup>a,b</sup> Shilpa Dabas,<sup>a,b</sup> Eswaran Chinnaraja,<sup>a,b</sup> Saravanan Subramanian,<sup>\*a,b</sup> and Palani S. Subramanian,<sup>\*a,b</sup>

---

<sup>a</sup>Inorganic Materials and Catalysis Discipline, CSIR – Central Salt and Marine Chemicals Research Institute, Bhavnagar – 364002 Gujarat, India.

<sup>b</sup>Academy of Scientific and Innovative Research (AcSIR), Ghaziabad-201002, India.

## List of contents

|     |                                                                                                                     |     |
|-----|---------------------------------------------------------------------------------------------------------------------|-----|
| S1  | General Methods                                                                                                     | S3  |
| S2  | BET Surface area Analysis for synthesized boehmite                                                                  | S4  |
| S3  | XPS analysis                                                                                                        | S4  |
| S4  | NH <sub>3</sub> -TPD analysis                                                                                       | S5  |
| S5  | A plausible mechanism for the acetalization of glycerol                                                             | S5  |
| S6  | Characterization data of glycerol products obtained through acetalization                                           | S6  |
| S7  | Selected <sup>1</sup> H-NMR of glycerol products                                                                    | S8  |
|     | 1. <sup>1</sup> H-NMR spectra of <b>1b</b>                                                                          |     |
|     | 2. <sup>1</sup> H-NMR spectra of <b>2b</b>                                                                          |     |
|     | 3. <sup>1</sup> H-NMR spectra of <b>3b</b>                                                                          |     |
|     | 4. <sup>1</sup> H-NMR spectra of <b>4b</b>                                                                          |     |
|     | 5. <sup>1</sup> H-NMR spectra of <b>5b</b>                                                                          |     |
|     | 6. <sup>1</sup> H-NMR spectra of <b>6b</b>                                                                          |     |
|     | 7. <sup>1</sup> H-NMR spectra of <b>9b</b>                                                                          |     |
|     | 8. <sup>1</sup> H-NMR spectra of <b>10b</b>                                                                         |     |
|     | 9. <sup>1</sup> H-NMR spectra of <b>13b</b>                                                                         |     |
|     | 10. <sup>1</sup> H-NMR spectra of <b>14b</b>                                                                        |     |
|     | 11. <sup>1</sup> H-NMR spectra of <b>15b</b>                                                                        |     |
|     | 12. <sup>1</sup> H-NMR spectra of <b>16b</b>                                                                        |     |
| S8  | Selected <sup>13</sup> C-NMR of glycerol products obtained through acetalization                                    | S14 |
|     | 1. <sup>13</sup> C-NMR spectra of <b>1b</b>                                                                         |     |
|     | 2. <sup>13</sup> C-NMR spectra of <b>2b</b>                                                                         |     |
|     | 3. <sup>13</sup> C-NMR spectra of <b>3b</b>                                                                         |     |
|     | 4. <sup>13</sup> C-NMR spectra of <b>4b</b>                                                                         |     |
|     | 5. <sup>13</sup> C-NMR spectra of <b>5b</b>                                                                         |     |
|     | 6. <sup>13</sup> C-NMR spectra of <b>6b</b>                                                                         |     |
|     | 7. <sup>13</sup> C-NMR spectra of <b>9b</b>                                                                         |     |
|     | 8. <sup>13</sup> C-NMR spectra of <b>10b</b>                                                                        |     |
|     | 9. <sup>13</sup> C-NMR spectra of <b>13b</b>                                                                        |     |
|     | 10. <sup>13</sup> C-NMR spectra of <b>14b</b>                                                                       |     |
|     | 11. <sup>13</sup> C-NMR spectra of <b>15b</b>                                                                       |     |
|     | 12. <sup>13</sup> C-NMR spectra of <b>16b</b>                                                                       |     |
| S9  | A comparison of catalytic activities using different protocols for the acetalization of glycerol using benzaldehyde | S20 |
| S10 | XRD analysis of fresh and reused catalyst                                                                           | S21 |
| S11 | SEM images of fresh and reusable WO <sub>3</sub> @boehmite catalyst                                                 | S22 |
|     | References                                                                                                          | S22 |

## S1. General Methods

Glycerol was purchased from Laboratory Rasayan, 4-bromo benzaldehyde from Sigma Aldrich, ammonium(para)tungstate (APT) from Otto chemicals, Aluminium nitrate from Sigma Aldrich, urea from local vendor and used without further purification. Gas chromatography-mass spectroscopy (GC-MS) analysis were performed on a Shimadzu TQ8040 GC-MS system instrument equipped with a SH-Rxi-5ms column (30mL, ID 0.25mm, DF 0.25micrometer).  $^1\text{H}$ ,  $^{13}\text{C}$  NMR spectra were recorded on a Bruker 500 MHz. Chemical shifts for proton resonances are reported in ppm ( $\delta$ ) relative to tetramethylsilane (TMS) while  $^{13}\text{C}$  is related to the deuterated standard solvent. BET surface area values were obtained *via* micromeritics (ASAP 2020) instrument. Powder X-ray diffraction patterns of the catalyst were recorded with Phillips XRD Rigaku Miniflex II Desktop X-ray Diffractometer equipped with ( $\lambda = 1.54050 \text{ \AA}$ ) over a  $2\theta$  range of 1-10 °C at a step time of  $0.05^\circ \text{ s}^{-1}$  Field Emission-Scanning Electron Microscopy (FE-SEM) micrographs were recorded using a JEOL JSM-7100F instrument employing an 18-kV accelerating voltage. High resolution-transmission electron microscope (HR-TEM) images were obtained using a JEOL JEM-2100 microscope with an acceleration voltage of 200 kV using carbon coated 200 mesh copper grids. XPS measurements for the catalyst were done on Thermo Kalpha+ spectrometer using Al - K $\alpha$  radiation with energy of 1486.6 eV. All the spectra were charge corrected with reference to C1s at 284.6 eV. The peak fitting were carried out using CasaXPS software with Shirley type background. Fourier-transform infrared spectroscopy (FT-IR) data were obtained using IR spectra were recorded using KBr pellet method on a Perkin–Elmer GX FTIR spectrometer. TGA analysis was carried out using Mettler Toledo Star SW 8.10. TG analysis was performed in nitrogen environment while the heating rate was ramped from room temperature to 600 °C at 10 °C/min.

## S2. BET surface area Analysis for synthesized Boehmite

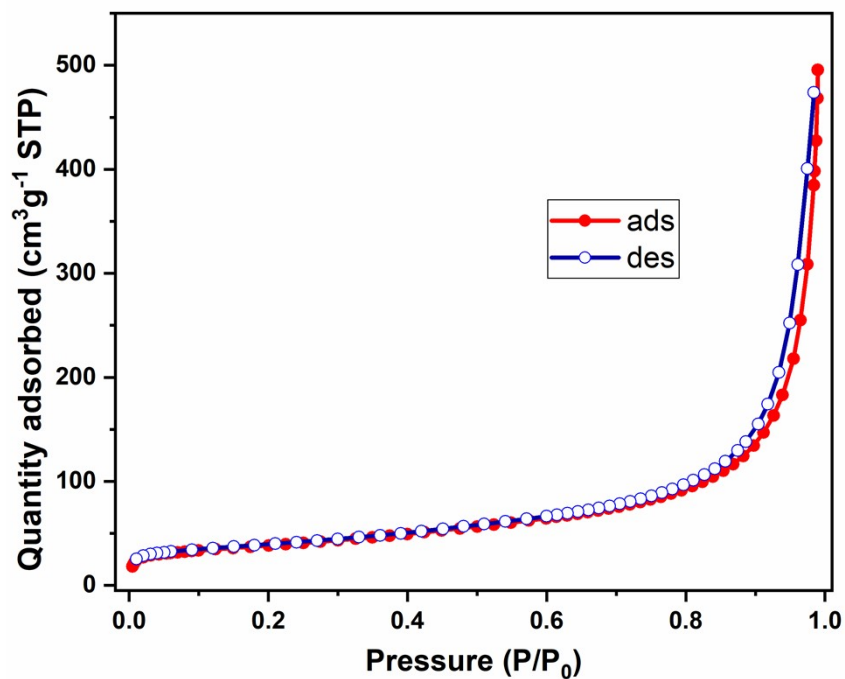

## S3. XPS recorded for WO<sub>3</sub>@Boehmite

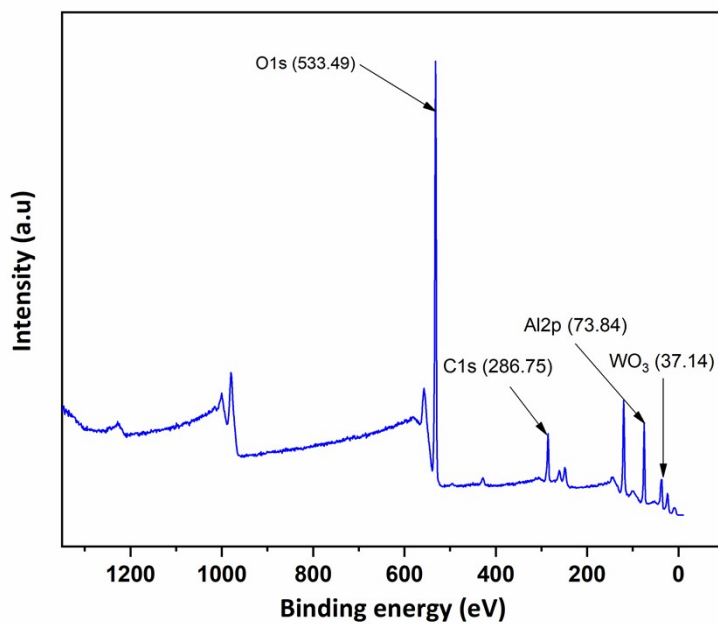

S4.  $\text{NH}_3$ -TPD recorded for Boehmite and  $\text{WO}_3$ @Boehmite

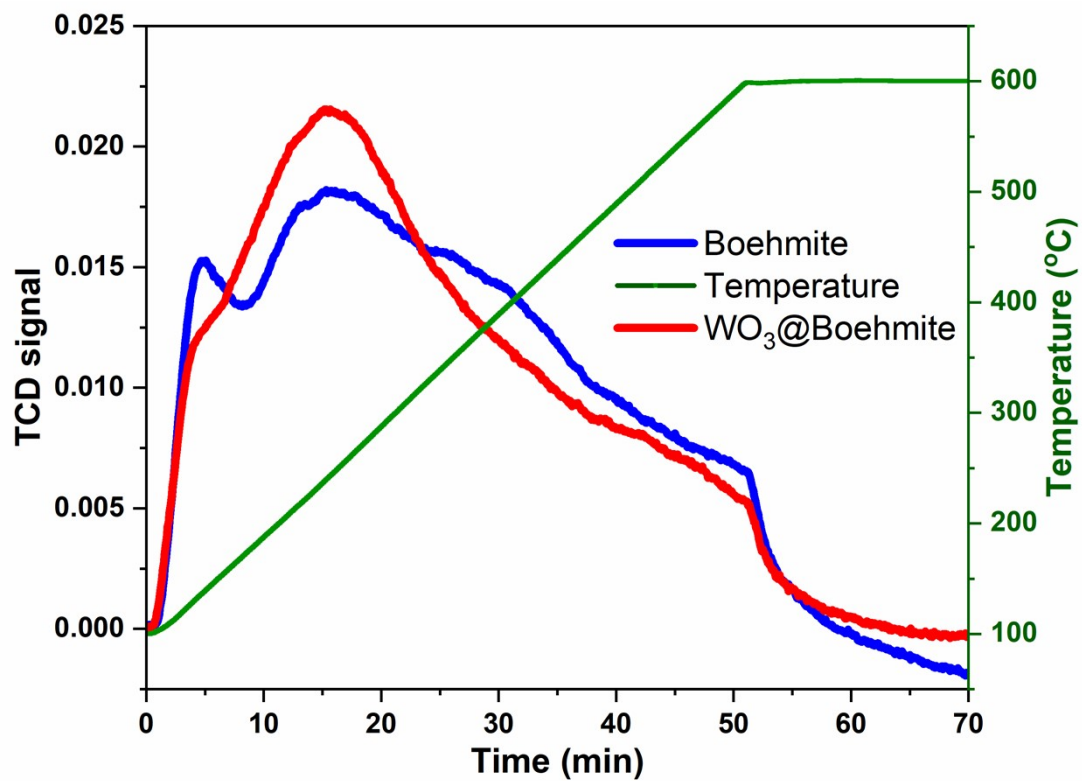

S5. Plausible mechanism of  $\text{WO}_3$ @Boehmite catalyzed acetalization of glycerol

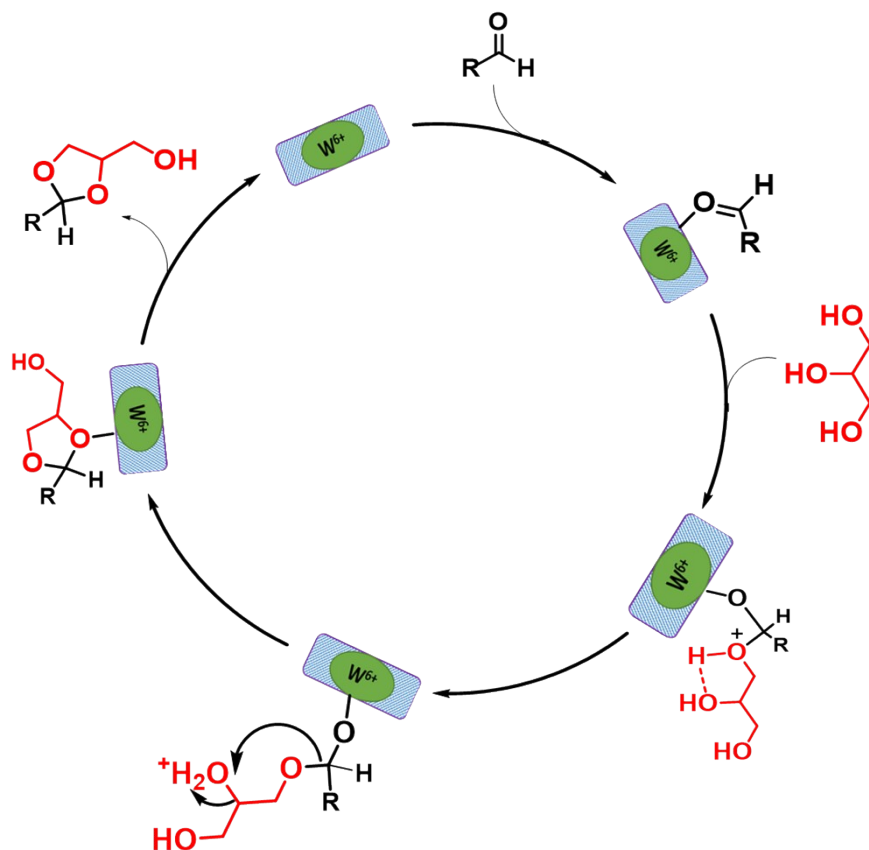

**S6. Characterization data of glycerol products obtained from acetylation (NMR, MS & GC)**

|                                                                                     |                                                                                                                                                                                                                                                                                                                                                                                                                                                                                                                                                                                              |
|-------------------------------------------------------------------------------------|----------------------------------------------------------------------------------------------------------------------------------------------------------------------------------------------------------------------------------------------------------------------------------------------------------------------------------------------------------------------------------------------------------------------------------------------------------------------------------------------------------------------------------------------------------------------------------------------|
| 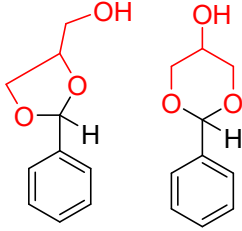   | <p><b>1b:</b> Colourless liquid, Conv: 97%, selectivity: 57%, <math>^1\text{H}</math> NMR (500 MHz, <math>\text{CDCl}_3\text{-d}</math>) <math>\delta</math> (TMS, ppm) = 8.08 – 7.34 (m, 10H), 5.94, 5.81 &amp; 5.54, 5.38 (2s &amp; 2s, 2H), 4.34 – 3.55 (m, 12H). <math>^{13}\text{C}</math> NMR (126 MHz) <math>\delta</math> = 137.81, 133.52, 130.16, 129.66, 129.40, 129.20, 129.08, 128.55, 128.50, 128.40, 126.79, 126.68, 126.48, 126.19, 125.97, 104.40, 103.87, 101.70, 101.02, 72.29, 71.71, 66.99, 66.82, 64.03, 63.29, 62.71, 61.28.</p>                                      |
|    | <p><b>2b:</b> colourless liquid, Conv: 100%, selectivity: 58%, <math>^1\text{H}</math> NMR (500 MHz, <math>\text{CDCl}_3\text{-d}</math>) <math>\delta</math> (TMS, ppm) = 7.48–7.46(m, 4H), 7.26–7.03 (m, 4H), 5.92, 5.79 &amp; 5.52, 5.38 (2s &amp; 2s 2H), 4.38– 3.58 (m 12H). <math>^{13}\text{C}</math> NMR (126 MHz) <math>\delta</math> = 133.83, 132.97, 132.90, 128.82, 128.75, 128.60, 128.54, 128.28, 128.21, 128.09, 128.02, 115.93, 115.76, 115.72, 115.65, 115.55, 115.48, 115.32, 103.91, 103.41, 101.18, 100.51, 72.41, 71.83, 67.09, 66.95, 64.08, 63.40, 62.82, 61.38.</p> |
|   | <p><b>3b:</b> colourless liquid, Conv: 88%, selectivity 84%, <math>^1\text{H}</math> NMR (500 MHz, <math>\text{CDCl}_3\text{-d}</math>) <math>\delta</math> (TMS, ppm) = 7.53–7.33 (m, 8H), 5.92–5.78 &amp; 5.51–5.37 (2s &amp; 2s, 2H), 4.37–3.63 (m, 10H). <math>^{13}\text{C}</math> NMR (126 MHz) <math>\delta</math> = 137.02, 136.24, 131.75, 131.69, 131.55, 128.41, 128.24, 127.79, 123.73, 103.72, 103.26, 72.35, 67.01, 66.80, 64.00, 63.28, 62.75, 1.14.</p>                                                                                                                      |
|  | <p><b>4b:</b> Brownish liquid, Conv: 57%, selectivity: 87%, <math>^1\text{H}</math> NMR (500 MHz, <math>\text{CDCl}_3\text{-d}</math>) <math>\delta</math> (TMS, ppm) = 8.26–8.24 (m, 4H), 7.69–7.65 (m, 4H), 6.06, 5.91 &amp; 5.63, 5.49 (2s &amp; 2s, 2H), 4.43–3.69 (m, 10H). <math>^{13}\text{C}</math> NMR (126 MHz) <math>\delta</math> = 127.68, 127.50, 123.80, 102.88, 102.57, 67.15, 66.90, 63.12, 62.70, 22.79.</p>                                                                                                                                                               |
|  | <p><b>5b:</b> : Colourless liquid, Conv: 84%, selectivity: 90%, <math>^1\text{H}</math> NMR (500 MHz, <math>\text{CDCl}_3\text{-d}</math>) <math>\delta</math> (TMS, ppm) = 7.57–7.13 (m, 8H), 6.12, 6.02 &amp; 5.69, 5.54 (2s &amp; 2s, 2H), 4.29–3.59 (m, 10H). <math>^{13}\text{C}</math> NMR (126 MHz) <math>\delta</math> = 135.85, 134.68, 133.13, 133.04, 132.08, 131.03, 130.84, 128.13, 127.95, 127.73, 127.55, 127.29, 123.12, 122.88, 103.08, 102.85, 72.50, 66.99, 63.09, 62.58.</p>                                                                                             |
|  | <p><b>6b:</b> Colourless liquid, Conv: 97%, selectivity: 96%, <math>^1\text{H}</math> NMR (500 MHz, <math>\text{CDCl}_3\text{-d}</math>) <math>\delta</math> (TMS, ppm) = 7.68 – 7.59 (m, 8H), 5.99, 5.84 &amp; 5.59, 5.43 (2s &amp; 2s, 2H), 4.41 – 3.66 (m, 10H). <math>^{13}\text{C}</math> NMR (126 MHz) <math>\delta</math> = 143.11, 142.27, 132.28, 132.12, 127.38, 127.15, 118.58, 118.53, 113.03, 112.81, 102.93, 102.54, 72.24, 67.07, 66.81, 62.91, 62.46.</p>                                                                                                                    |

|                                                                                     |                                                                                                                                                                                                                                                                                                                                                                                                                                                                                                                                                                                         |
|-------------------------------------------------------------------------------------|-----------------------------------------------------------------------------------------------------------------------------------------------------------------------------------------------------------------------------------------------------------------------------------------------------------------------------------------------------------------------------------------------------------------------------------------------------------------------------------------------------------------------------------------------------------------------------------------|
| 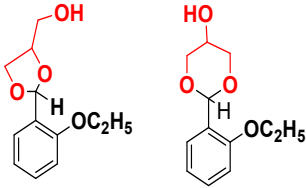   | <p><b>9b:</b> Colourless liquid, Conv: 98%, selectivity: 50%, <math>^1\text{H}</math> NMR (500 MHz, <math>\text{CDCl}_3\text{-d}</math>) <math>\delta</math> (TMS, ppm) = 7.32–6.88 (m, 8H), 6.32, 6.16 &amp; 5.88, 5.78 (2s &amp; 2s, 2H), 4.33–3.03 (m, 10H), 3.87–3.57 (m, 4H), 1.44–1.41 (m, 6H). <math>^{13}\text{C}</math> NMR (126 MHz) <math>\delta</math> = 130.80, 130.51, 130.29, 127.72, 127.12, 126.91, 120.70, 120.49, 112.24, 112.11, 112.02, 100.51, 99.77, 98.09, 96.71, 77.41, 77.16, 76.91, 72.53, 72.30, 66.91, 66.83, 64.25, 64.14, 63.34, 62.83, 14.96, 1.14.</p> |
|    | <p><b>10b:</b> Brownish liquid, Conv: 60%, selectivity: 82%, <math>^1\text{H}</math> NMR (500 MHz, <math>\text{CDCl}_3\text{-d}</math>) <math>\delta</math> (TMS, ppm) = 7.42–7.23 (m, 8H), 5.85, 5.70 &amp; 5.44, 5.29 (2s &amp; 2s, 2H), 4.29–3.56 (m, 10H). <math>^{13}\text{C}</math> NMR (126 MHz) <math>\delta</math> = 140.08, 139.21, 134.49, 133.57, 129.88, 129.85, 129.71, 129.45, 126.83, 126.64, 124.93, 124.70, 103.46, 103.01, 72.31, 66.98, 66.76, 63.97, 63.18, 62.66.</p>                                                                                             |
|   | <p><b>13b:</b> Brownish liquid, Conv: 78%, selectivity: 52%, <math>^1\text{H}</math> NMR (500 MHz, <math>\text{CDCl}_3\text{-d}</math>) <math>\delta</math> (TMS, ppm) = 8.12–8.10 (m, 3H), 7.77–7.64 (m, 5H), 7.40–7.39 (m, 6H) 6.51, 6.37 &amp; 6.02, 5.78 (2s &amp; 2s, 2H), 4.33–3.59 (m, 10H). <math>^{13}\text{C}</math> NMR (126 MHz) <math>\delta</math> = 133.93, 132.97, 129.85, 128.78, 128.72, 126.46, 125.91, 125.79, 125.18, 125.09, 124.06, 123.97, 123.77, 123.67, 102.60, 100.31, 72.53, 72.20, 66.82, 64.16, 62.83.</p>                                               |
|  | <p><b>14b:</b> Colourless liquid, Conv: 63%, selectivity: 66%, <math>^1\text{H}</math> NMR (500 MHz, <math>\text{CDCl}_3\text{-d}</math>) <math>\delta</math> (TMS, ppm) = 7.37–7.18 (m, 13H), 6.94–6.86 (m, 5H), 6.28, 6.16 &amp; 5.85, 5.75 (2s &amp; 2s, 2H), 5.08–5.04 (m, 4H), 4.30–3.61 (m, 10H). <math>^{13}\text{C}</math> NMR (126 MHz) <math>\delta</math> = 137.08, 130.78, 130.56, 129.31, 128.69, 128.05, 127.62, 127.36, 127.17, 125.39, 121.16, 120.97, 112.69, 112.59, 100.27, 99.84, 98.07, 72.57, 72.26, 70.44, 66.86, 64.23, 63.39, 62.79, 61.50.</p>                |
|  | <p><b>15b:</b> Colourless liquid, Conv: 79%, selectivity: 95%, <math>^1\text{H}</math> NMR (500 MHz, <math>\text{CDCl}_3\text{-d}</math>) <math>\delta</math> (TMS, ppm) = 8.72–8.60 (m, 4H), 7.85–7.81 (m, 2H), 7.35–7.29 (m, 2H), 5.98, 5.86 &amp; 5.61 (2s &amp; 1s, 2H), 4.39–3.71 (m, 10H). <math>^{13}\text{C}</math> NMR (126 MHz) <math>\delta</math> = 152.69, 151.09, 150.27, 150.08, 148.12, 147.96, 134.89, 134.70, 133.96, 133.32, 123.63, 123.45, 102.42, 101.96, 72.35, 67.18, 67.00, 62.97, 62.49.</p>                                                                  |
|  | <p><b>16b:</b> Brownish liquid, Conv: , selectivity: 52%, <math>^1\text{H}</math> NMR (500 MHz, <math>\text{CDCl}_3\text{d}</math>) <math>\delta</math> (TMS, ppm) = 8.40–7.98 (m, 18H), 6.86, 6.73 &amp; 6.36, 6.14 (2s &amp; 2s, 2H), 4.51–3.70 (m, 10H). <math>^{13}\text{C}</math> NMR (126 MHz) <math>\delta</math> = 132.02, 131.26, 130.67, 128.20, 128.12, 128.06, 127.99, 127.47, 126.10, 125.65, 125.54, 124.95, 124.85, 124.80, 124.75, 124.70, 124.60, 123.56, 123.37, 123.11, 122.93, 102.63, 102.56, 100.56, 72.71, 72.38, 67.05, 64.22, 63.34, 62.94, 61.45.</p>         |





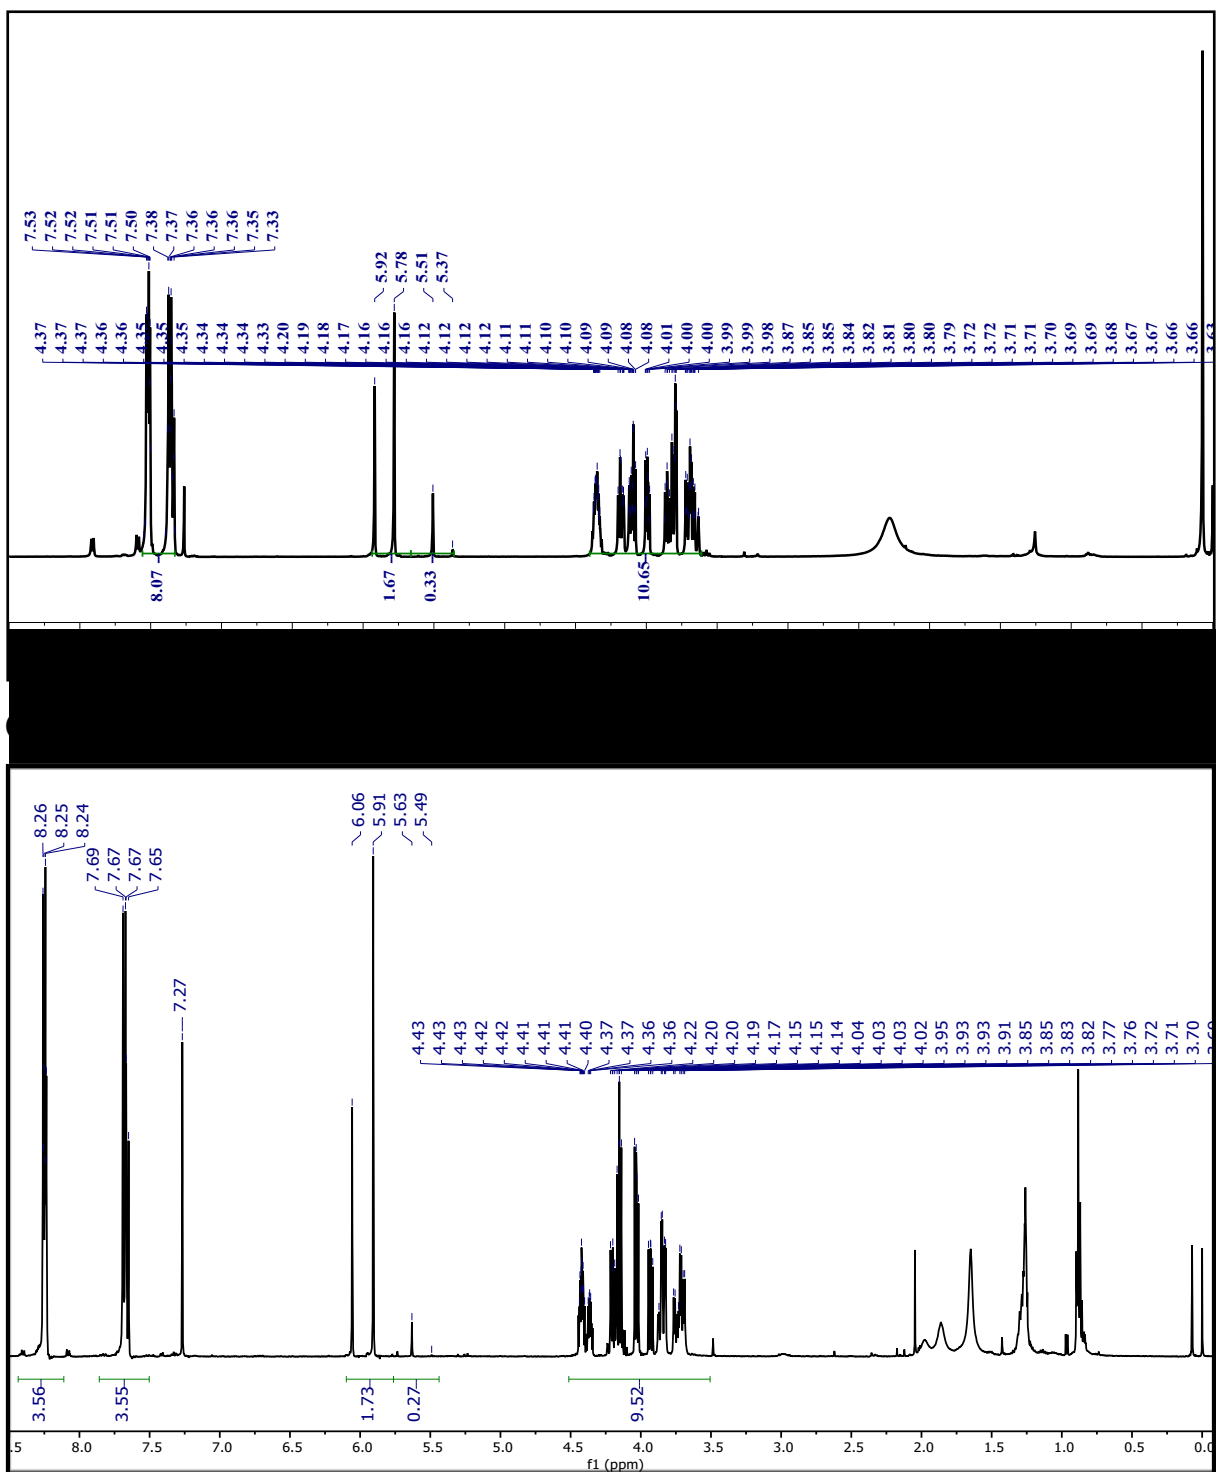

(iv). <sup>1</sup>H-NMR spectra of **4b**

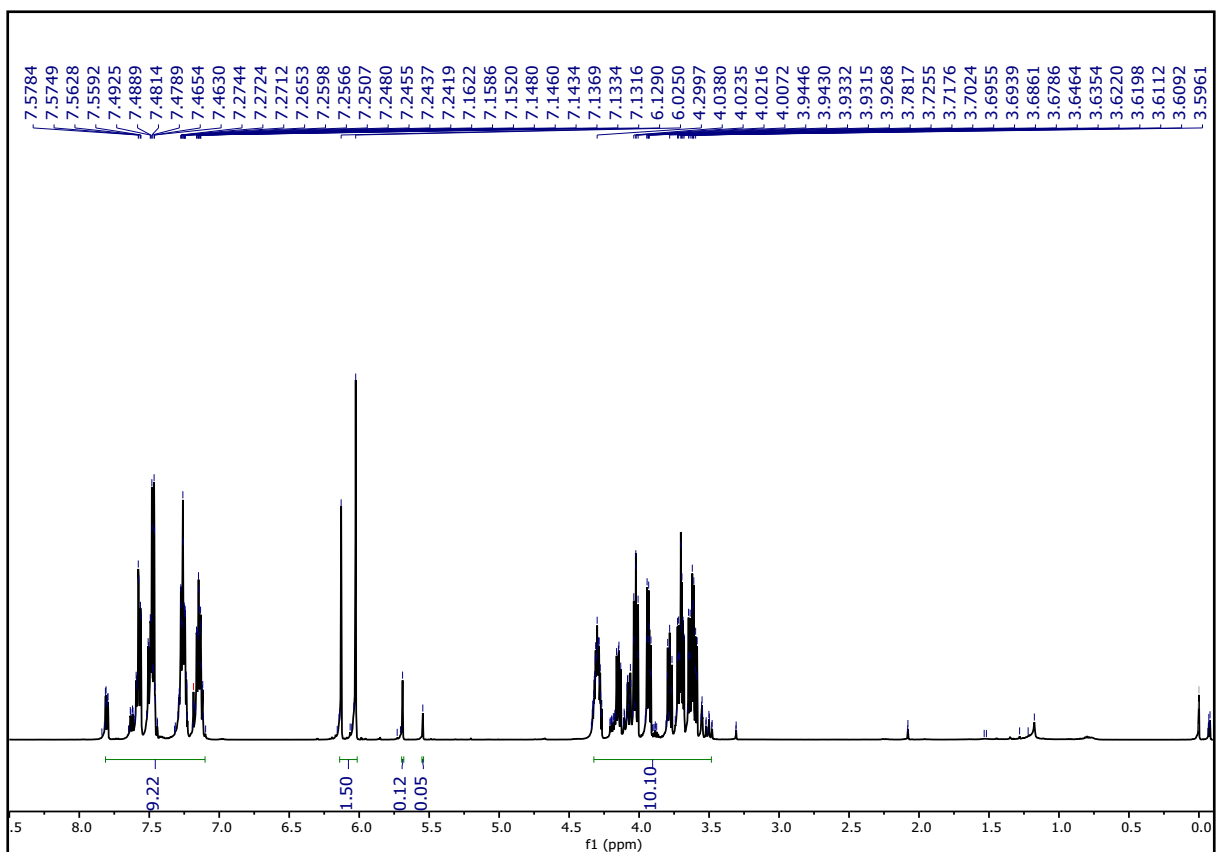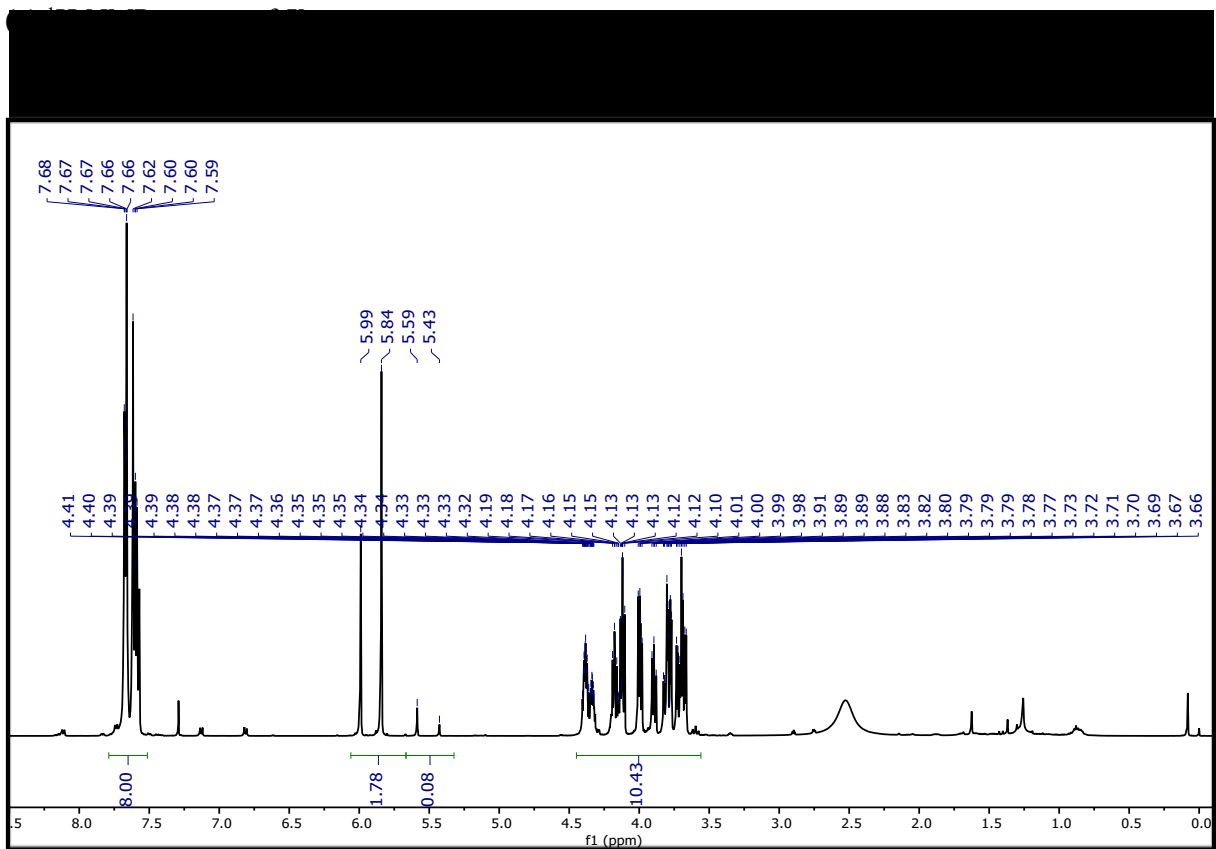

(vi). <sup>1</sup>H-NMR spectra of **6b**

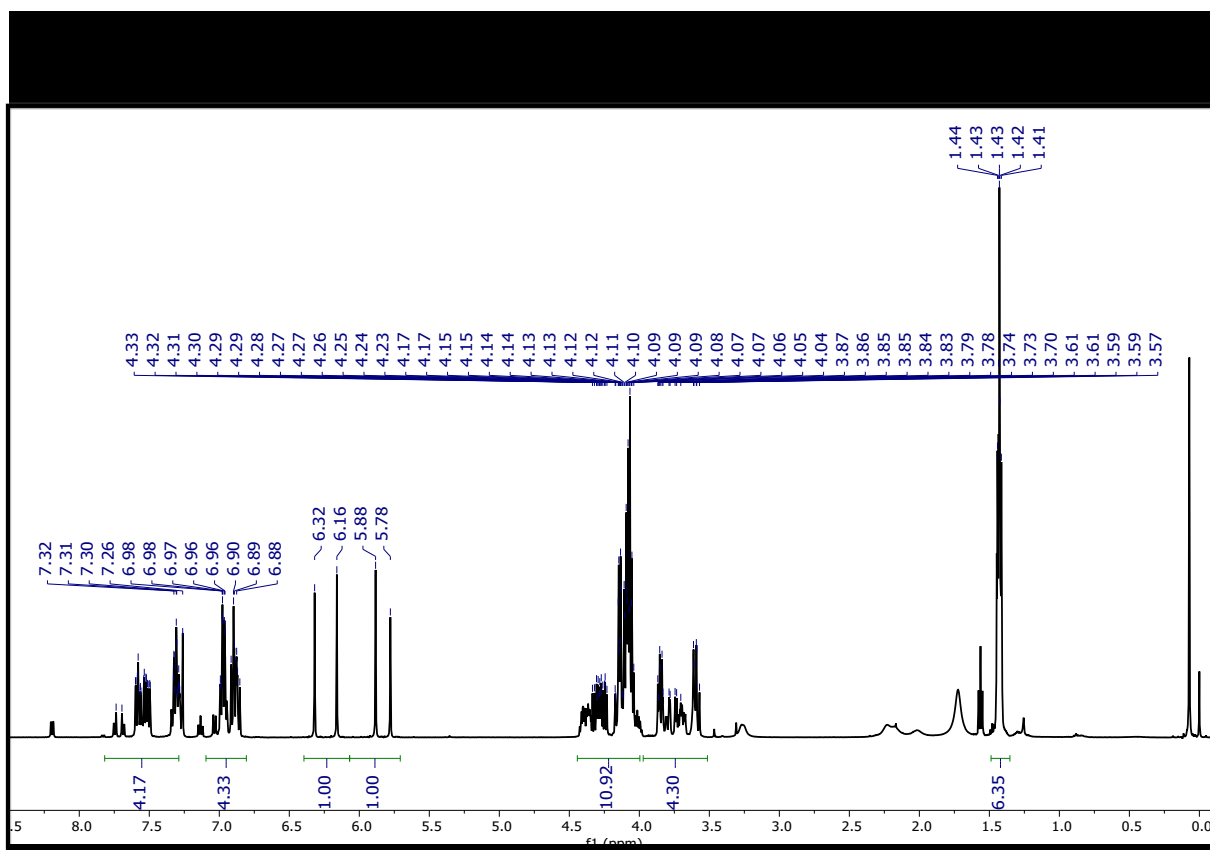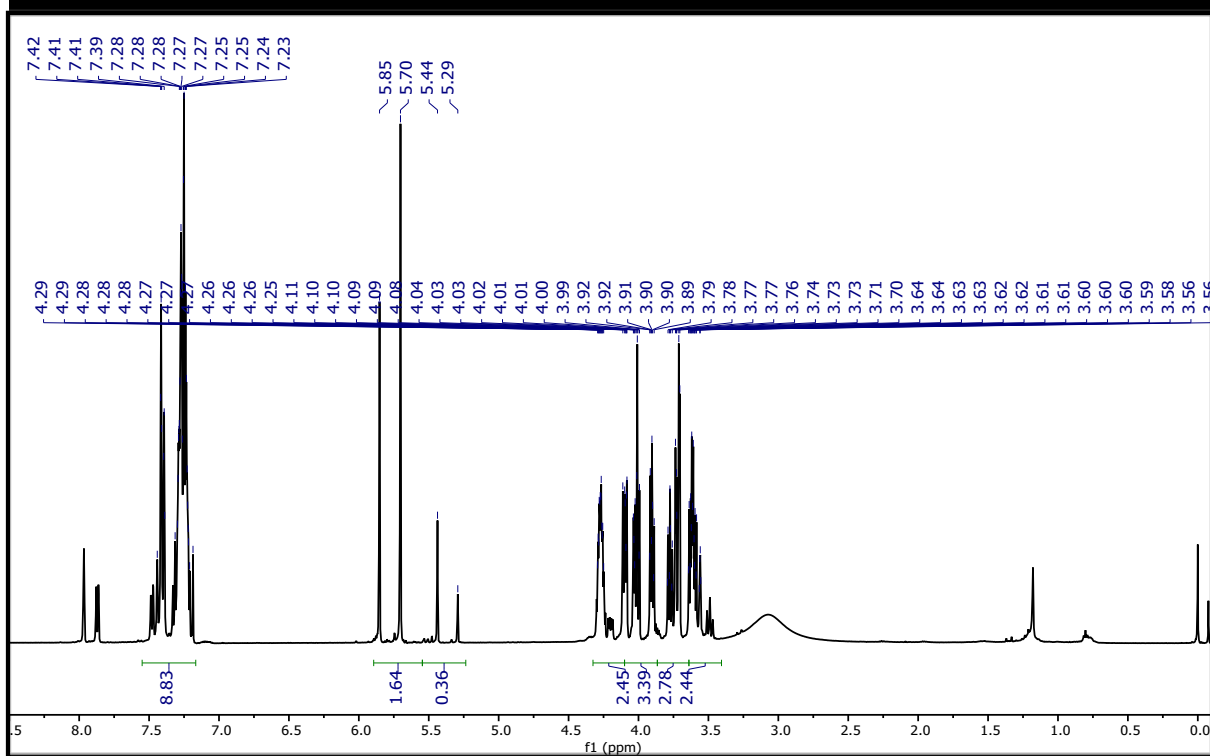

(viii). <sup>1</sup>H-NMR spectra of **10b**

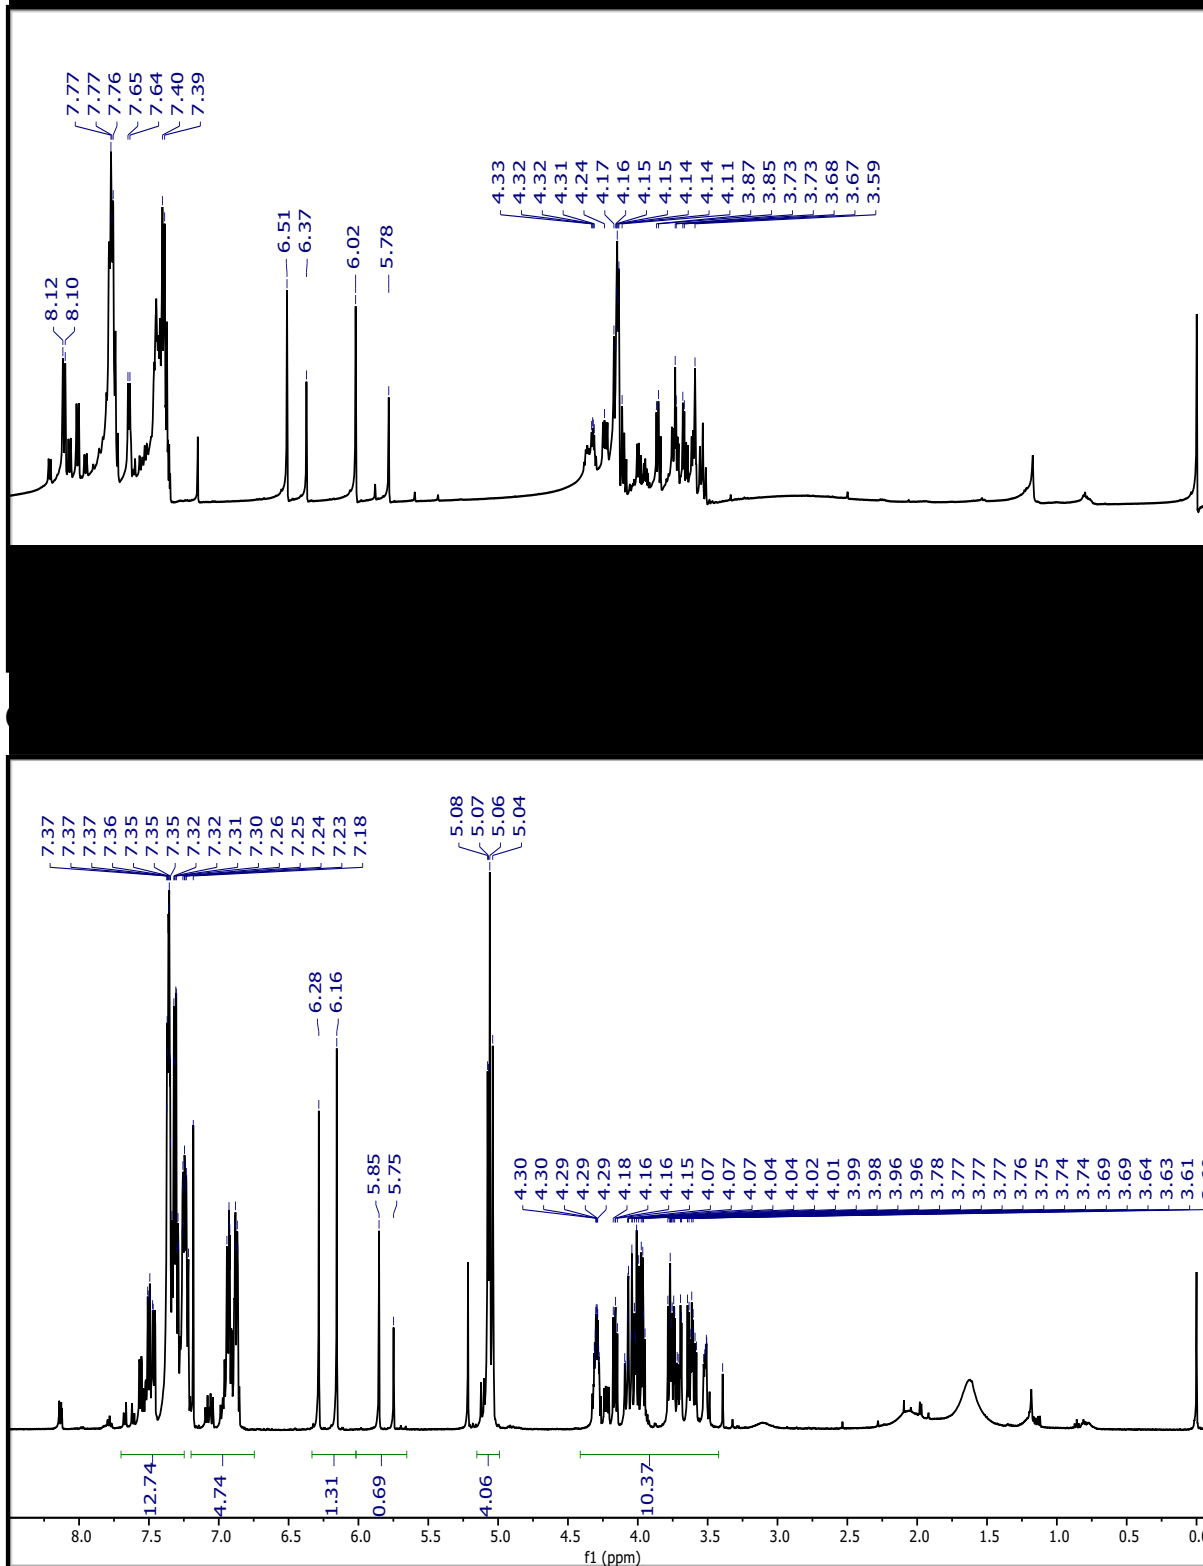

(x).  $^1\text{H-NMR}$  spectra of **14b**

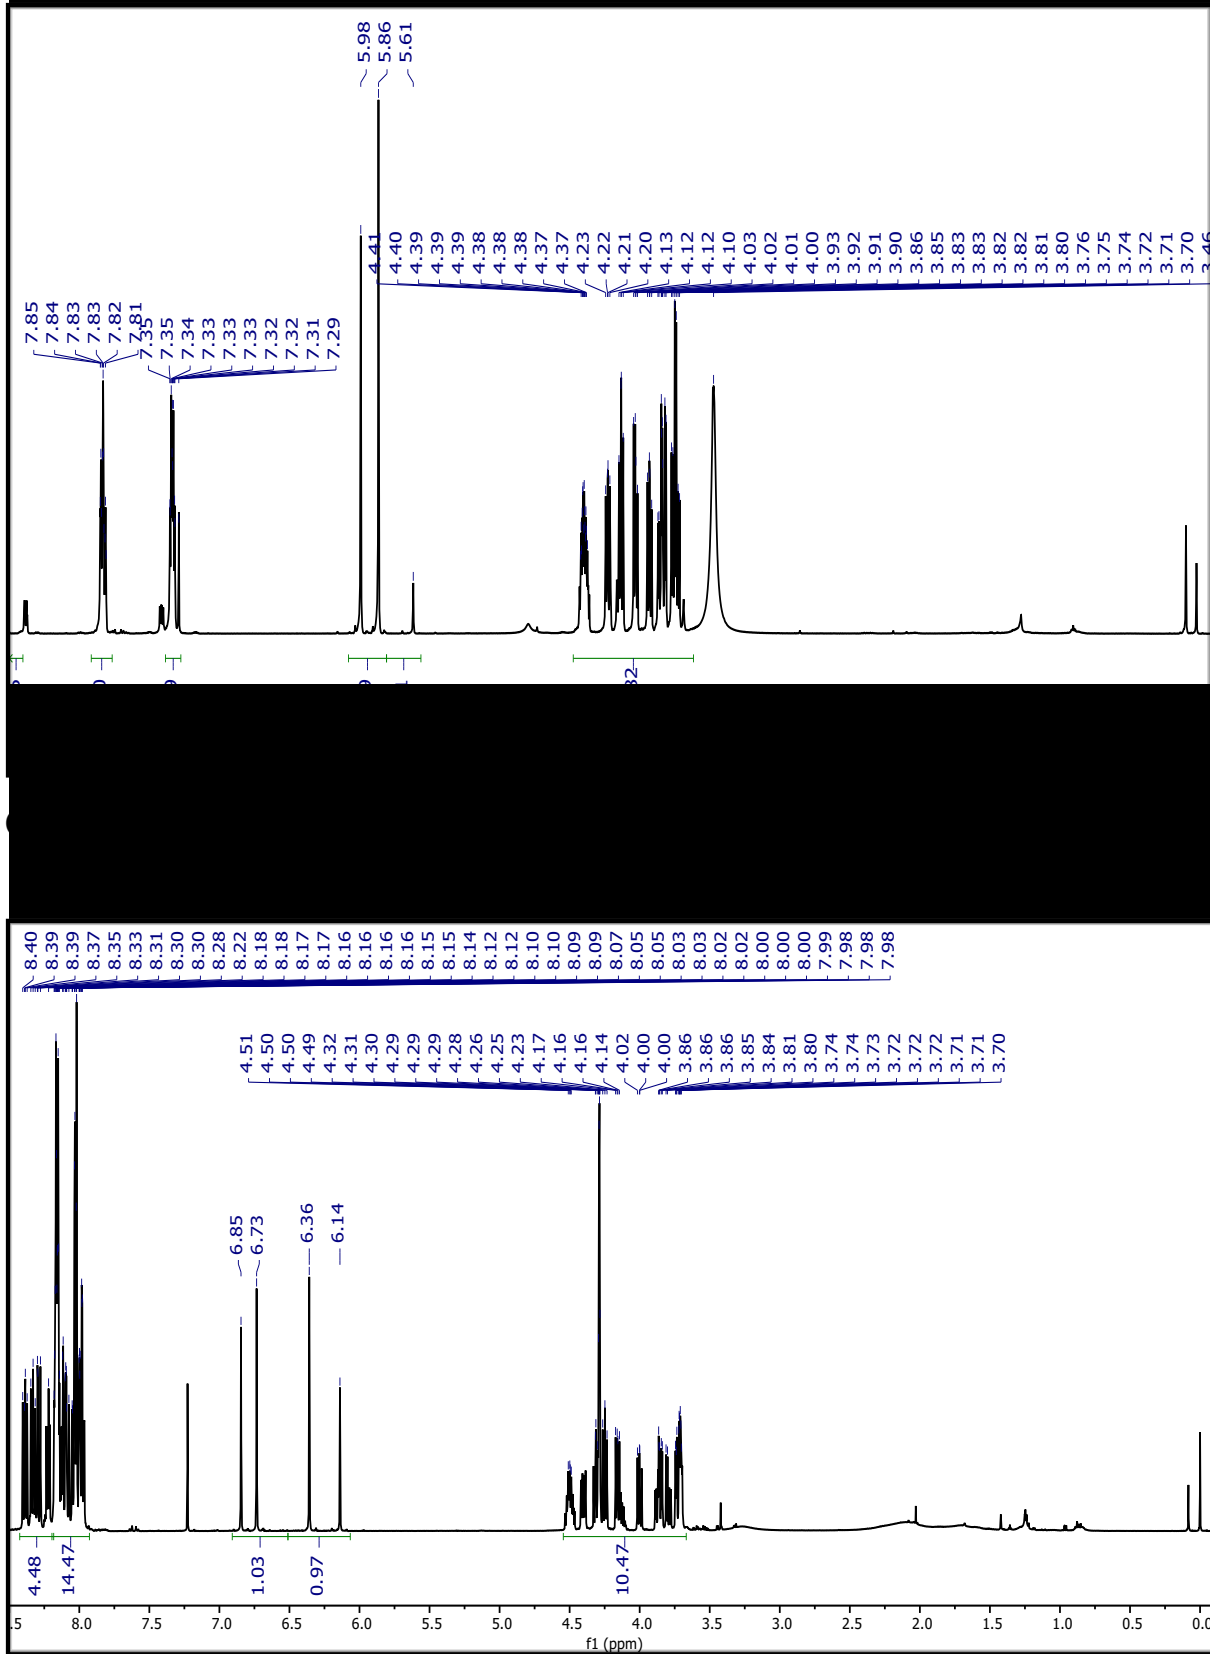

(xii).  $^1\text{H-NMR}$  spectra of **16b**

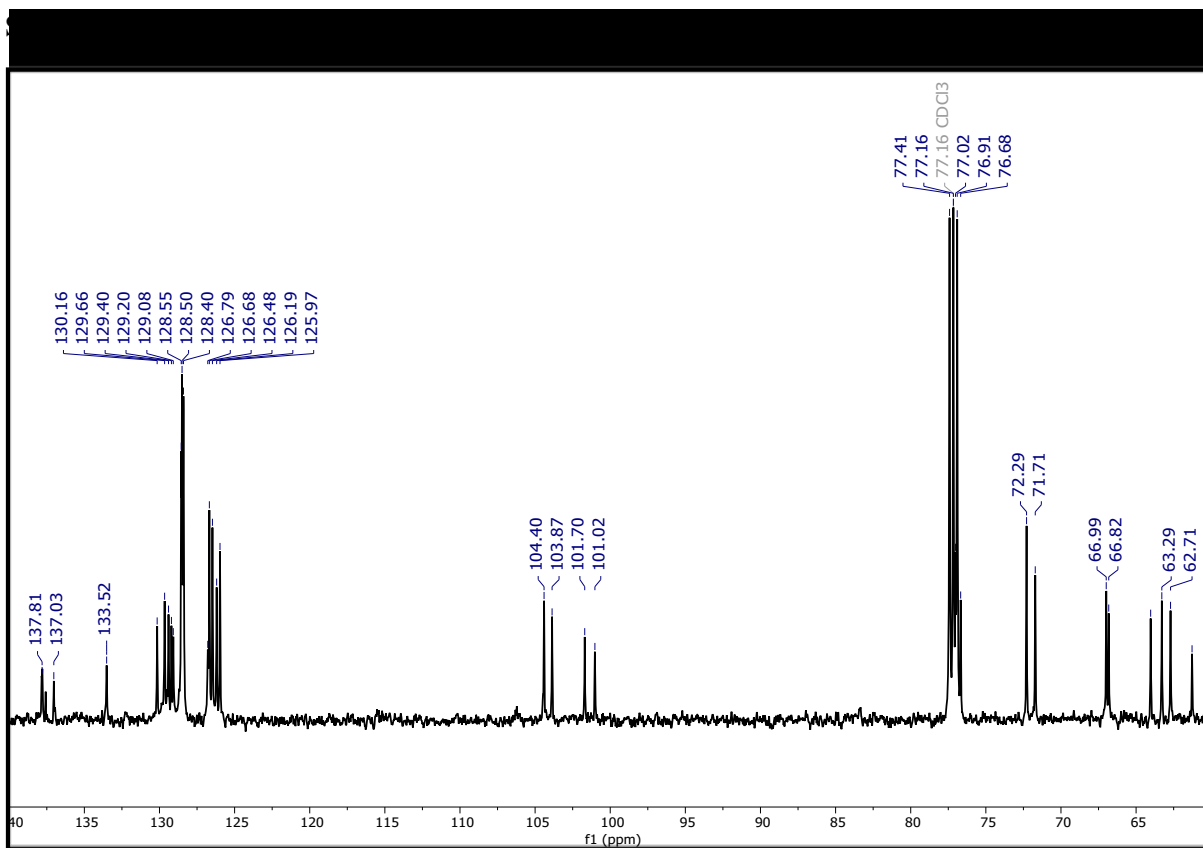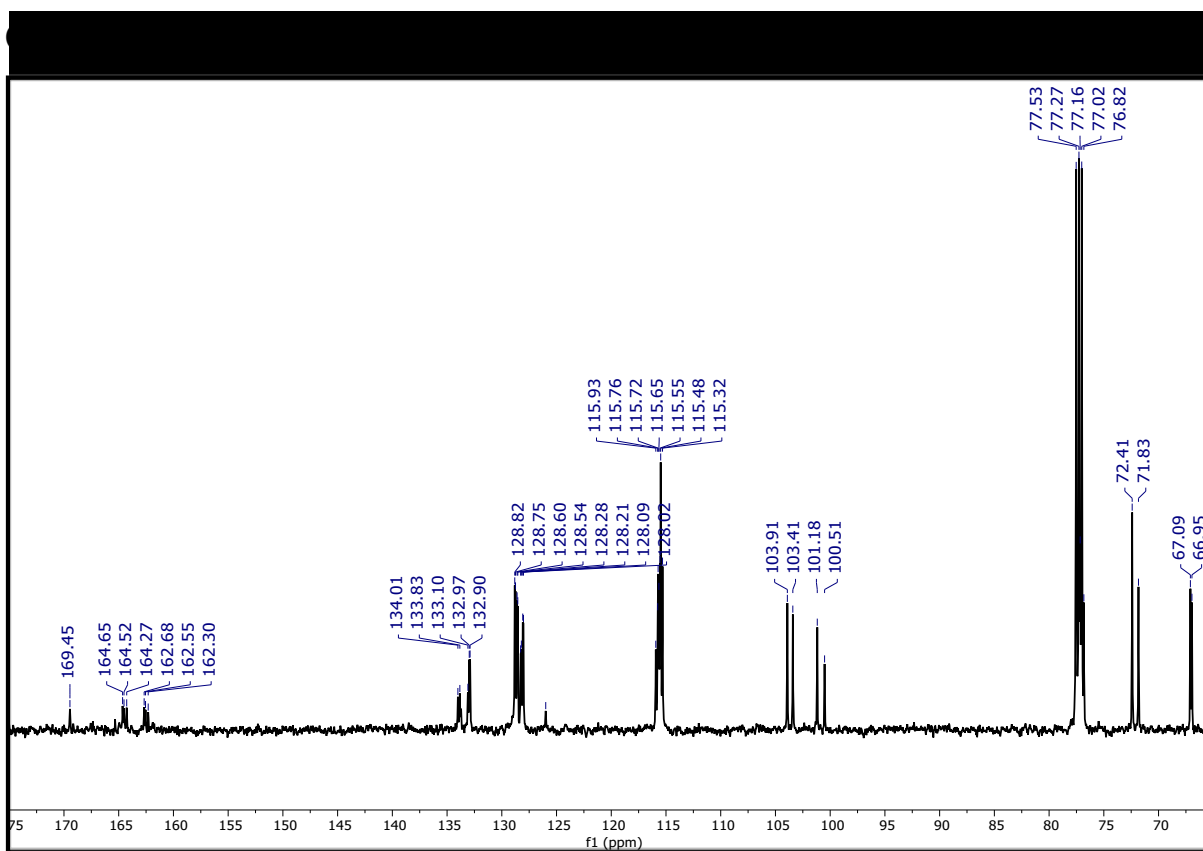

(ii). <sup>13</sup>C NMR spectra of 2b

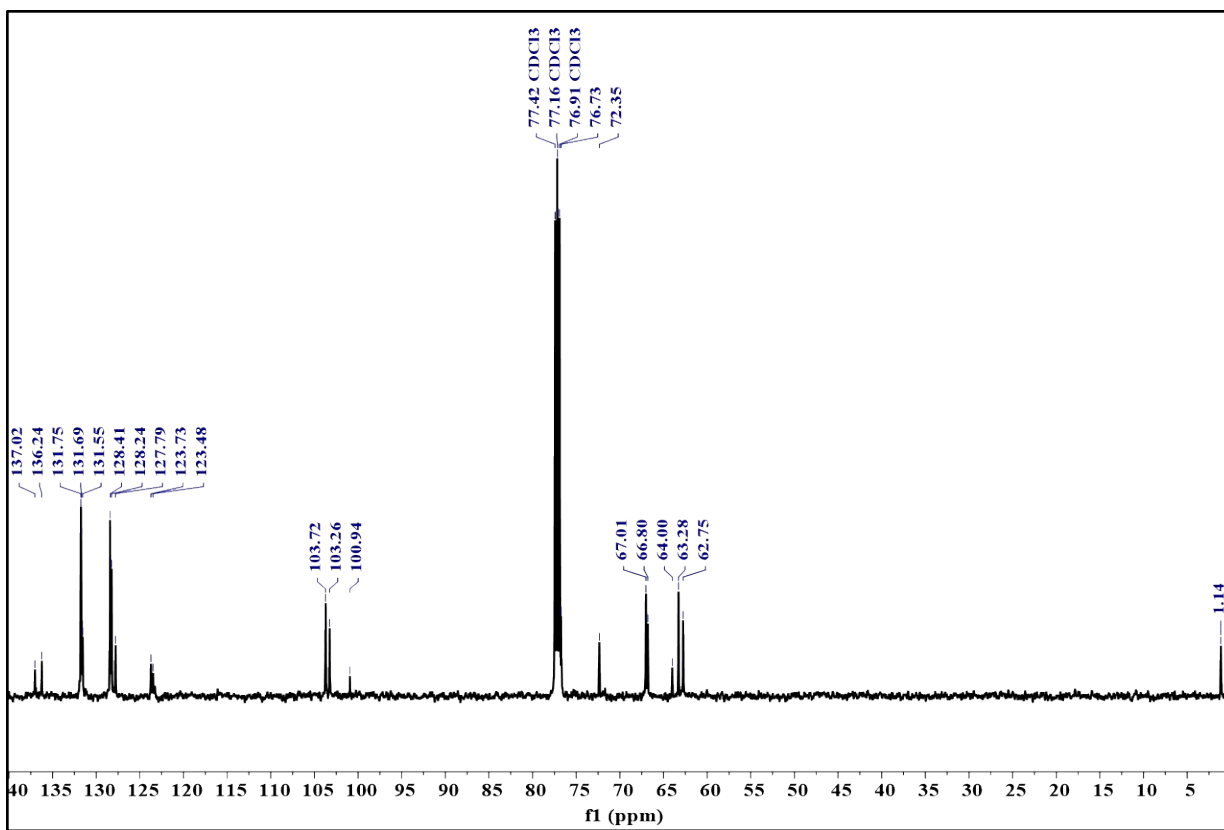

(iii). <sup>13</sup>C NMR spectra of **3b**

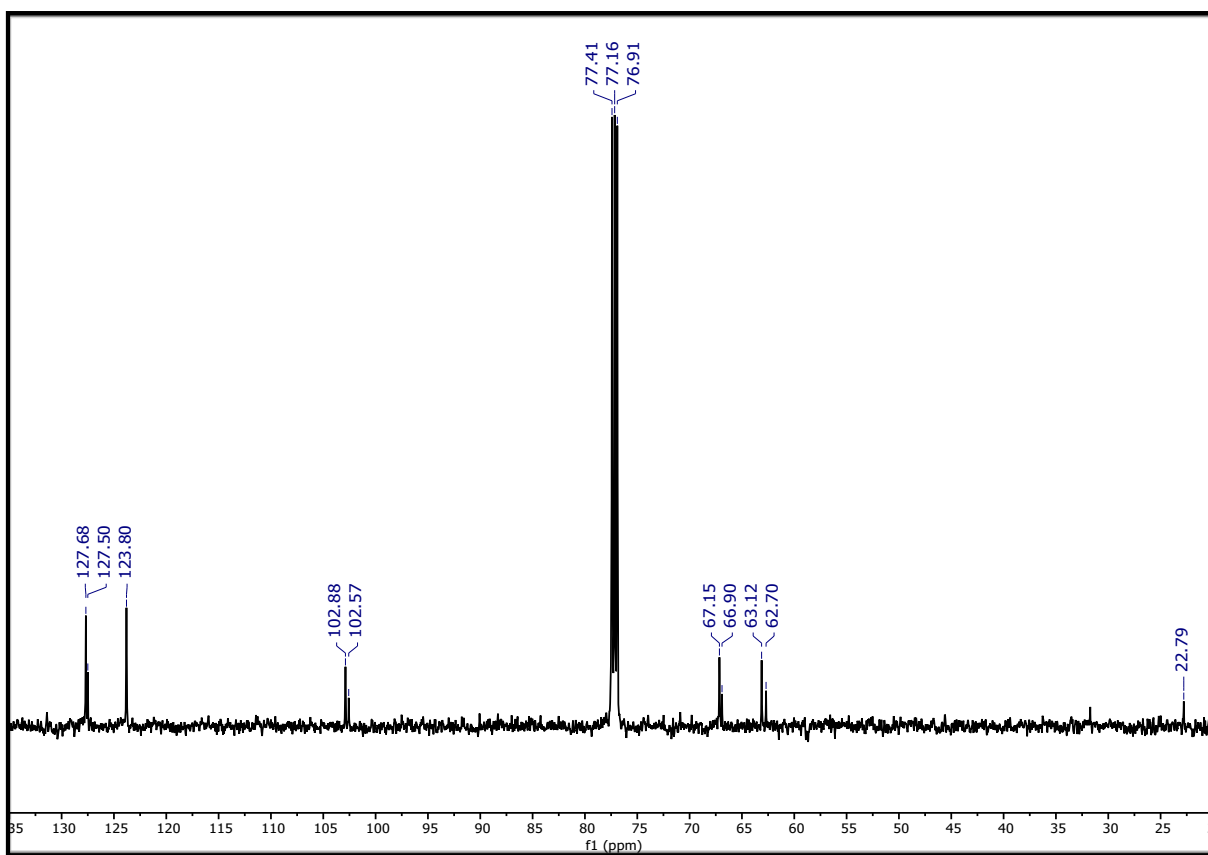

(iv). <sup>13</sup>C NMR spectra of **4b**

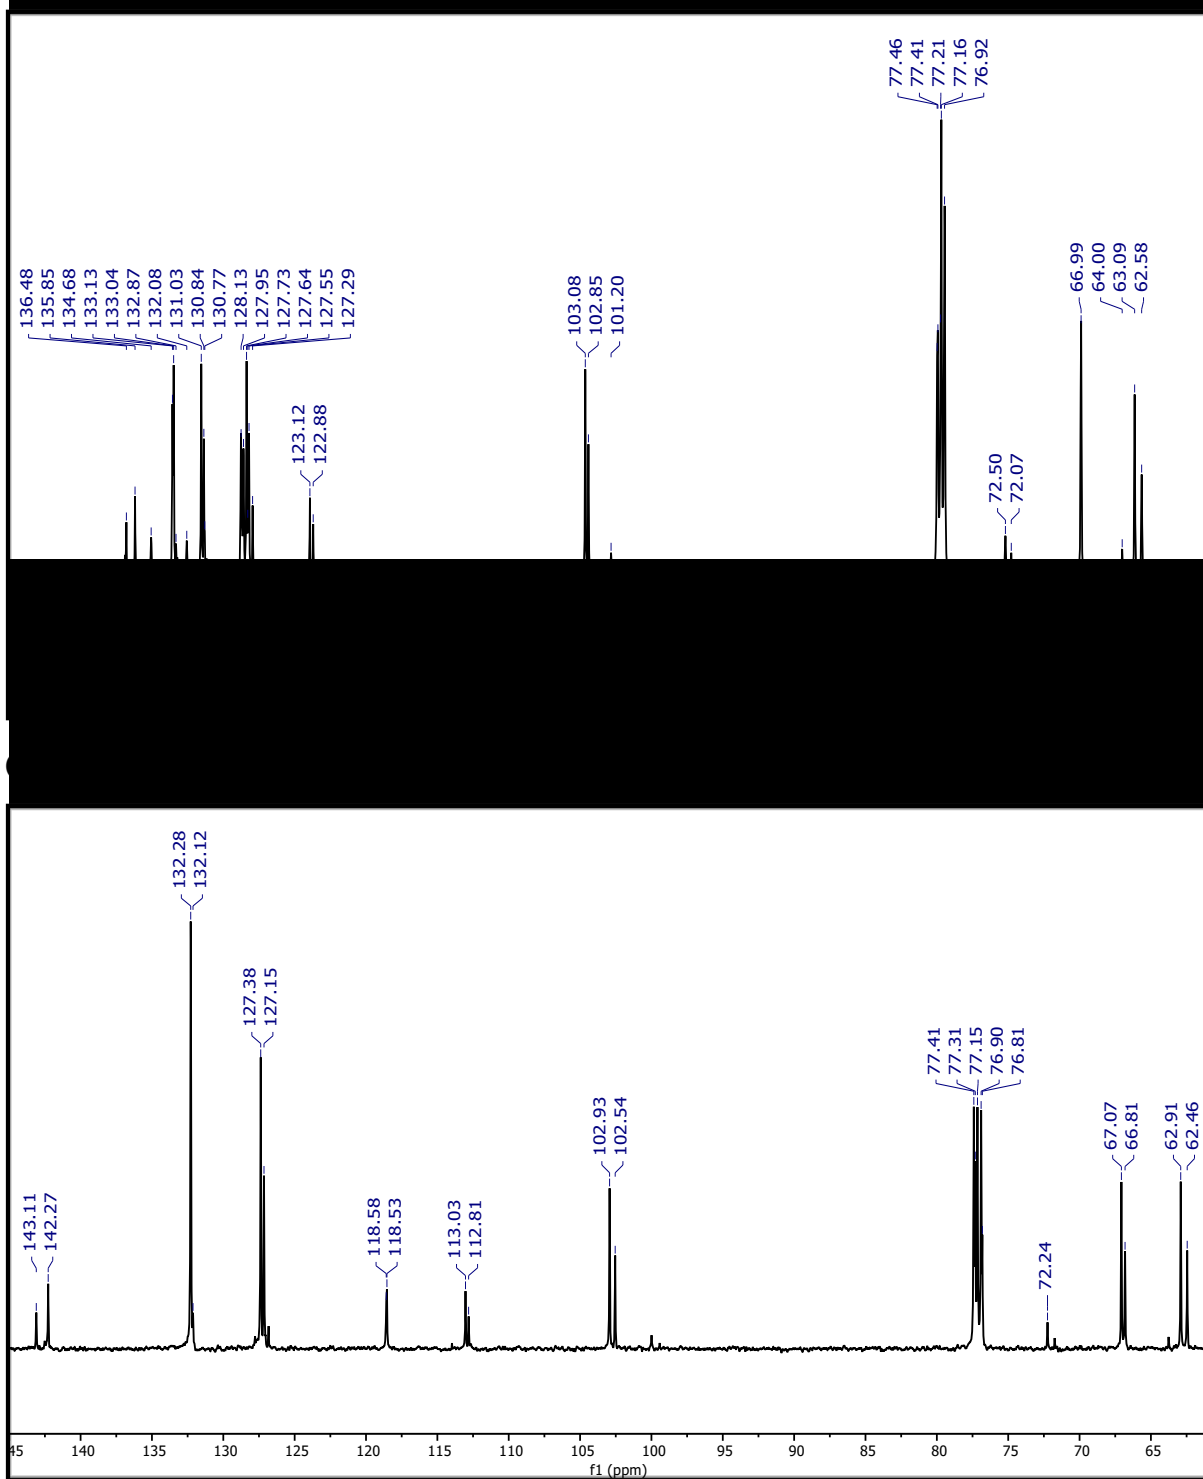

(vi). <sup>13</sup>C NMR spectra of **6b**



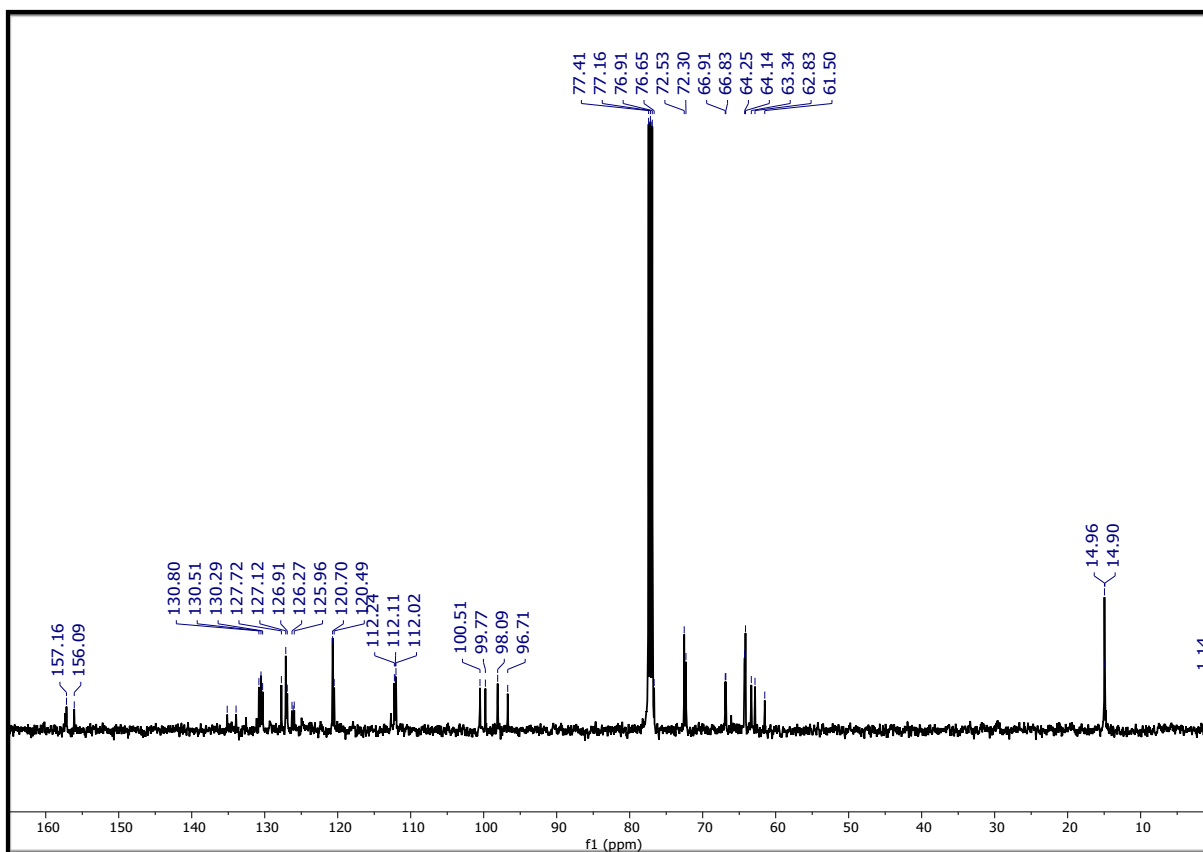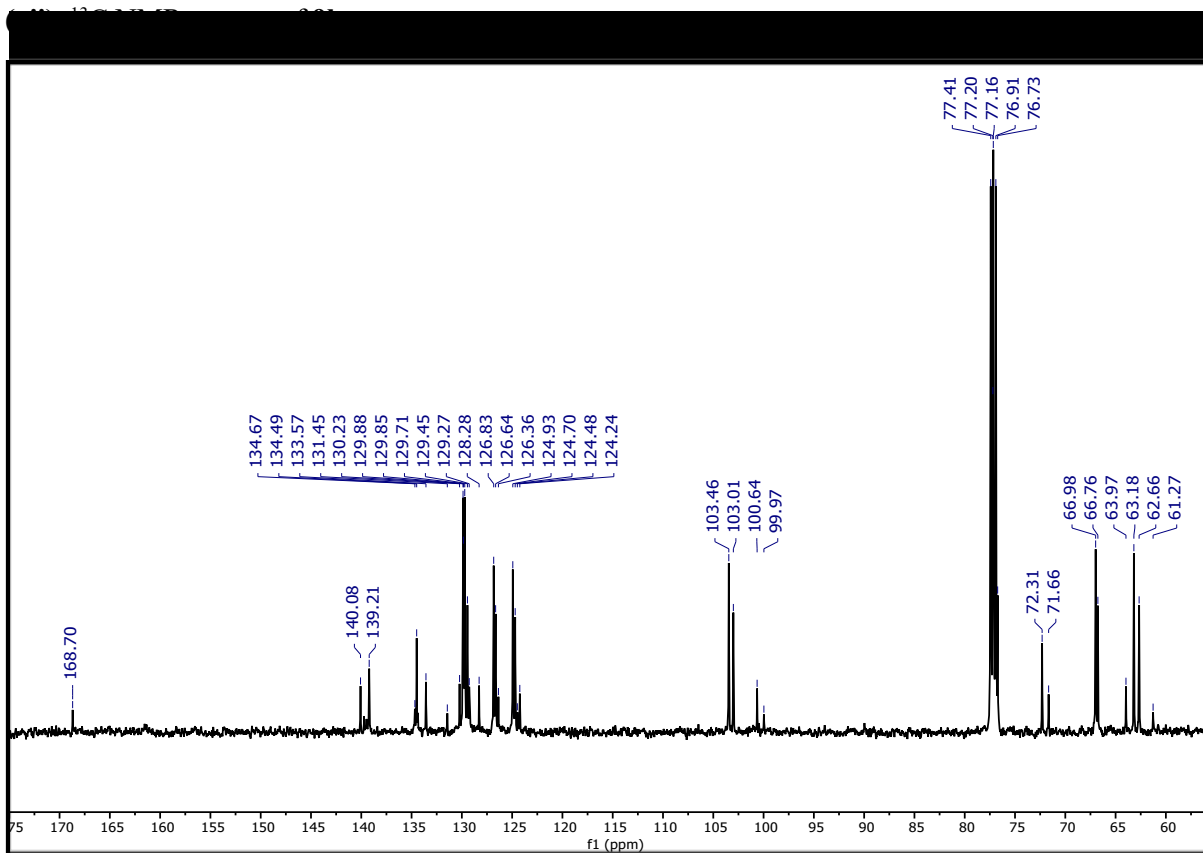

(viii). <sup>13</sup>C NMR spectra of 10b

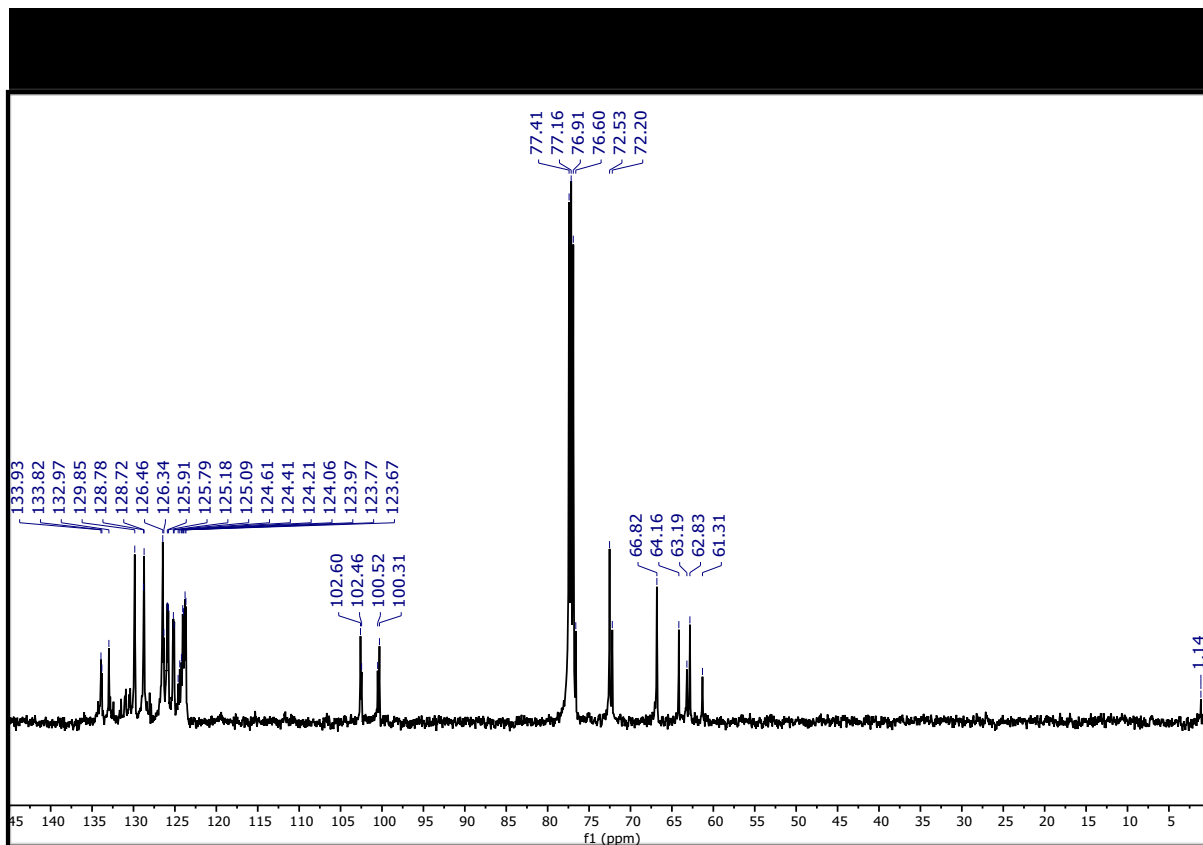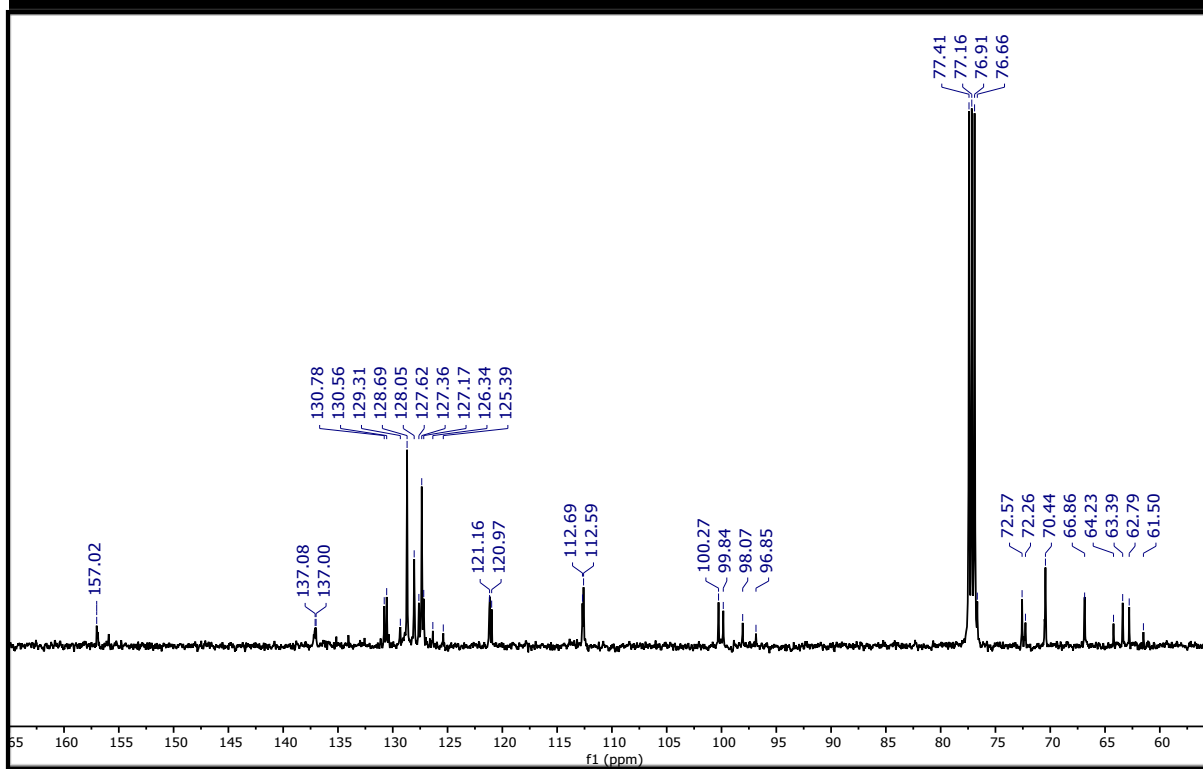

(x). <sup>13</sup>C NMR spectra of **14b**

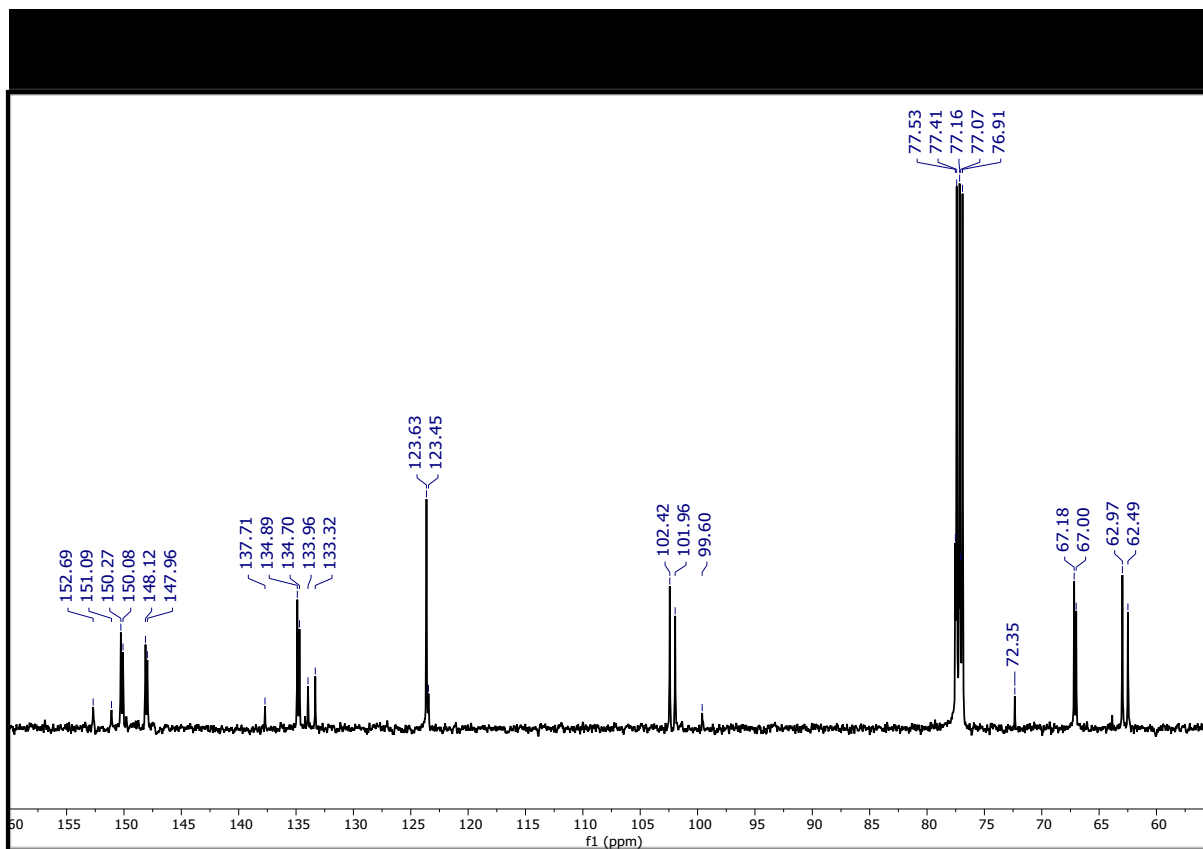

(xi).  $^{13}\text{C}$  NMR spectra of **15b**

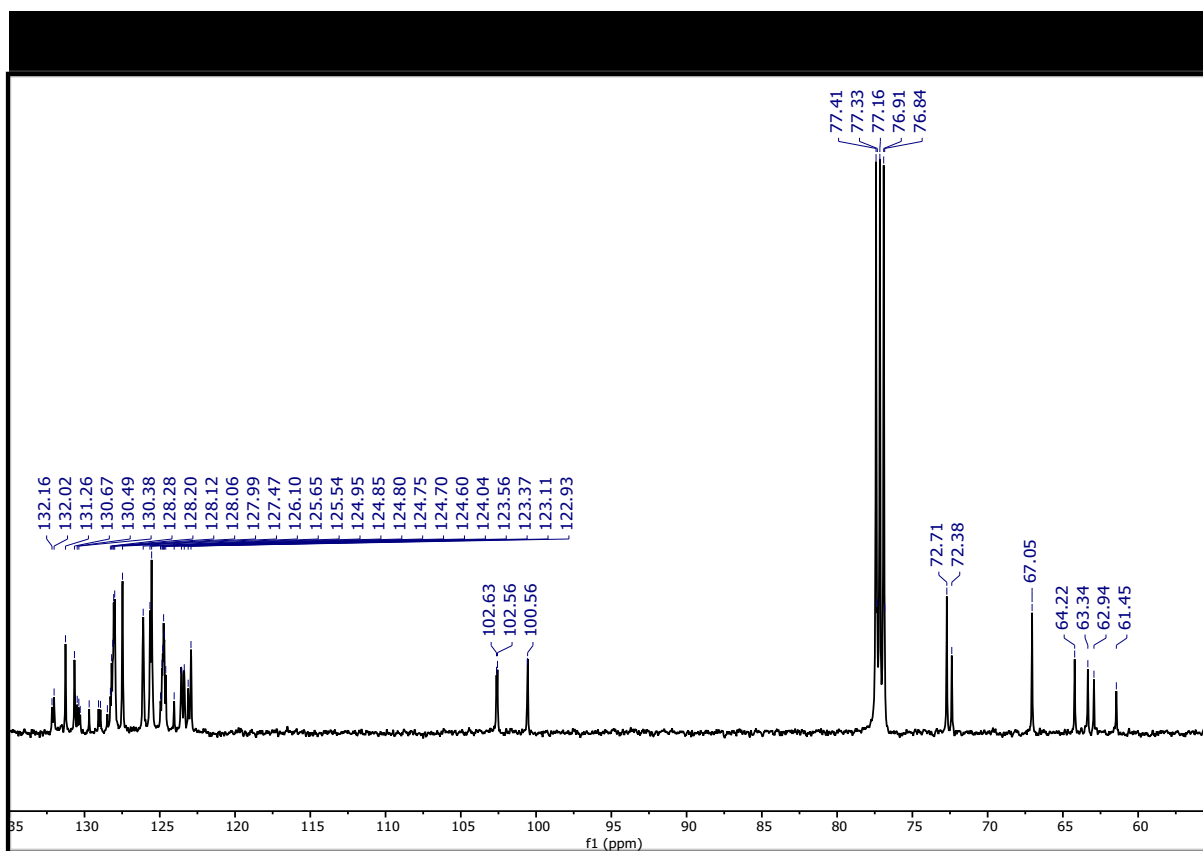

(xii).  $^{13}\text{C}$  NMR spectra of **16b**

**S9. A comparison of catalytic activities using different protocols for the acetalization of glycerol using benzaldehyde**

| S. No. | Reaction conditions                                               |                  |            |              |          | Conversion (%) | Maximum Selectivity Achieved <sup>a</sup> (Dioxolane/dioxane) | Ref.      |
|--------|-------------------------------------------------------------------|------------------|------------|--------------|----------|----------------|---------------------------------------------------------------|-----------|
|        | Catalyst                                                          | Substrate amount | Temp. (°C) | Solvent      | Time (h) |                |                                                               |           |
| 1      | BBnU                                                              | 2:1              | 60         | Solvent free | 1        | 88             | 63/37                                                         | 1         |
| 2      | SiW <sub>11</sub> /MCM-41                                         | 1:1.2            | 30         | Solvent free | 1        | 85             | 82:18                                                         | 2         |
| 3      | M <sub>0</sub> O <sub>x</sub> -TiO <sub>2</sub> -ZrO <sub>2</sub> | 1:1              | 100        | Toluene      | 1/2      | 74             | 50:50                                                         | 3         |
| 4      | Cu <sub>3</sub> (BTC) <sub>2</sub>                                | 1:1              | RT         | ACN          | 24       | 25             | 86:14                                                         | 4         |
| 5      | Fe/Al-SBA-15                                                      | 1:1              | 100        | Solvent free | 8        | 72             | 84:16                                                         | 5         |
| 6      | SO <sub>4</sub> 2-/CeO <sub>2</sub> -ZrO <sub>2</sub> catalyst    | 1:3              | 100        | Toluene      | 8        | 91             | 87:13                                                         | 6         |
| 7      | zeolite USY-2                                                     | 2:1              | 147        | Toluene      | 1        | 93             | 58:42                                                         | 7         |
| 8      | MoO <sub>3</sub> /SiO <sub>2</sub>                                | 1.1:1            | 100        | Toluene      | 8        | 72             | 40:60                                                         | 8         |
| 9      | Al-SBA-15                                                         | 1:1              | 100        | Solvent free | 8        | 82             | 83:17                                                         | 9         |
| 10     | FeCl <sub>3</sub> .6H <sub>2</sub> O                              | 0.3:2            | 60         | THF          | 3        | 51             | 39:61                                                         | 10        |
| 11     | MZrP-1                                                            | 1:1              | 100        | Solvent free | 8        | 98             | 63:37                                                         | 11        |
| 12     | AnPOP-SO <sub>3</sub> H c                                         | 1:4              | 40         | Solvent free | 1.5      | 97             | 63:37                                                         | 12        |
| 13     | WO <sub>3</sub> @Boehmite                                         | 1:1.5            | 100        | Toluene      | 20       | 97             | 96                                                            | This work |

<sup>a</sup> The table compares the activity of different catalysts reported in the literature for the acetalization of glycerol with benzaldehyde derivative. The representative example of benzaldehyde derivative is showed based on the report where the selectivity of dioxolane is maximum.

S10. XRD of fresh and reused catalyst

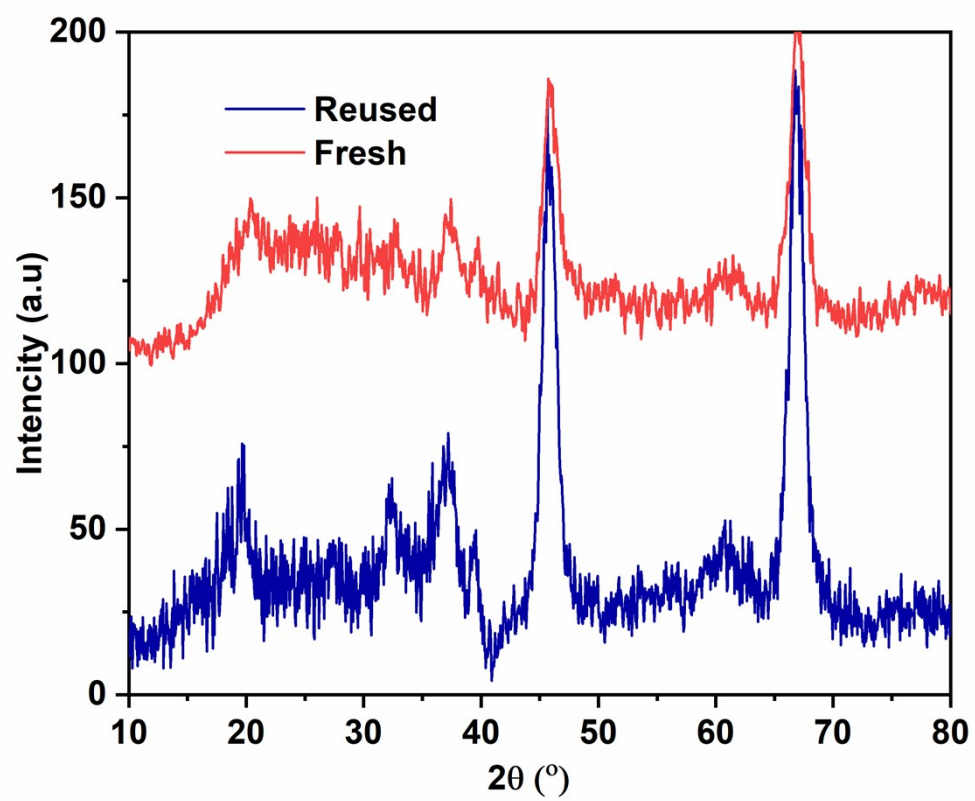

### S11. SEM images of fresh and reusable WO<sub>3</sub>@boehmite catalyst

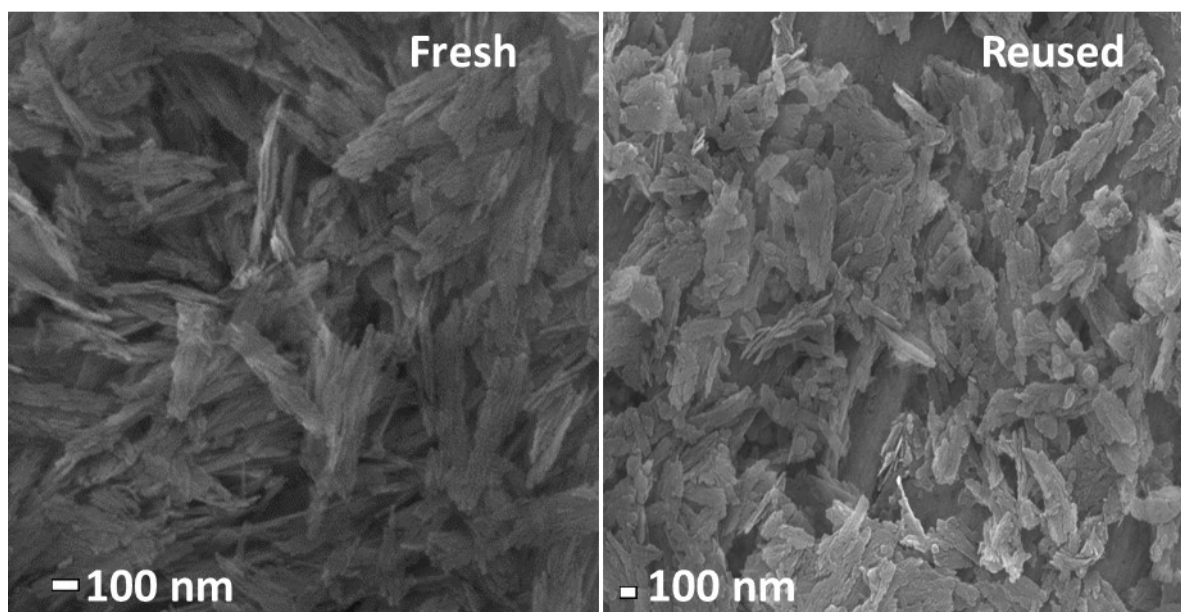

#### References

1. R. R. Pawar, K. A. Gosai, A. S. Bhatt, S. Kumaresan, S. M. Lee and H. C. Bajaj, Clay Catalysed Rapid Valorization of Glycerol towards Cyclic Acetals and Ketals, *RSC Advances*, 2015, **5**, 83985-83996.
2. N. Narkhede and A. Patel, Room Temperature Acetalization of Glycerol to Cyclic Acetals over Anchored Silicotungstates under Solvent Free Conditions, *RSC Advances*, 2014, **4**, 19294-19301.
3. P. Sudarsanam, B. Mallesham, A. N. Prasad, P. S. Reddy and B. M. Reddy, Synthesis of Bio-additive Fuels from Acetalization of Glycerol with Benzaldehyde over Molybdenum Promoted Green Solid Acid Catalysts, *Fuel Processing Technology*, 2013, **106**, 539-545.
4. A. Dhakshinamoorthy, M. Alvaro and H. Garcia, Metal Organic Frameworks as Solid Acid Catalysts for Acetalization of Aldehydes with Methanol, *Adv. Synth. Catal.*, 2010, **352**, 3022-3030.
5. C. Gonzalez-Arellano, S. De and R. Luque, Selective Glycerol Transformations to High Value-Added Products Catalysed by Aluminosilicate-Supported Iron Oxide Nanoparticles, *Catal. Sci. Technol.*, 2014, **4**, 4242-4249.
6. R. M. Kulkarni and N. Arvind, Acetalization of Glycerol and Benzaldehyde to Synthesize Biofuel Additives Using SO<sub>4</sub><sup>2-</sup>/CeO<sub>2</sub>-ZrO<sub>2</sub> Catalyst, *Heliyon*, 2021, **7**, e06018.
7. M. J. Climent, A. Corma and A. Velty, Synthesis of Hyacinth, Vanilla, and Blossom Orange Fragrances: the Benefit of Using Zeolites and Delaminated Zeolites as Catalysts, *Appl. Catal. A*, 2004, **263**, 155-161.
8. S. B. Umbarkar, T. V. Kotbagi, A. V. Biradar, R. Pasricha, J. Chanale, M. K. Dongare, A.-S. Mamede, C. Lancelot and E. Payen, Acetalization of Glycerol Using Mesoporous MoO<sub>3</sub>/SiO<sub>2</sub> Solid Acid Catalyst, *J. Mol. Catal.*, 2009, **310**, 150-158.

9. C. Gonzalez-Arellano, R. A. D. Arancon and R. Luque, Al-SBA-15 Catalysed Cross-Esterification and Acetalisation of Biomass-Derived Platform Chemicals, *Green Chemistry*, 2014, **16**, 4985-4993.
10. S. Zaher, L. Christ, M. Abd El Rahim, A. Kanj and I. Karamé, Green Acetalization of Glycerol and Carbonyl Catalyzed by  $\text{FeCl}_3 \cdot 6\text{H}_2\text{O}$ , *Mol. Catal.*, 2017, **438**, 204-213.
11. S. S. Islam, P. Bhanja, K. Ghosh, R. A. Molla, N. Yasmin, D. Das and S. M. Islam, Mesoporous Zirconium Oxophosphate: An Efficient Catalyst for the Synthesis of Cyclic Acetals and Cyclic Carbonates under Solvent-Free Conditions, *ChemistrySelect*, 2017, **2**, 10595-10602.
12. S. K. Kundu, R. Singuru, T. Hayashi, Y. Hijikata, S. Irle and J. Mondal, Constructing Sulfonic Acid Functionalized Anthracene Derived Conjugated Porous Organic Polymer for Efficient Metal-Free Catalytic Acetalization of Bio-Glycerol, *ChemistrySelect*, 2017, **2**, 4705-4716.
